# Supplementary material for: Paving the way for human vaccination against Rift Valley fever virus: A systematic literature review of RVFV epidemiology from 1999 to 2021
Source: PubMed Central journal article supplement (PMC8812886; doi:10.1371/journal.pntd.0009852), 2022-01-24

# Odds Ratio of RVFV Infection via Butchering

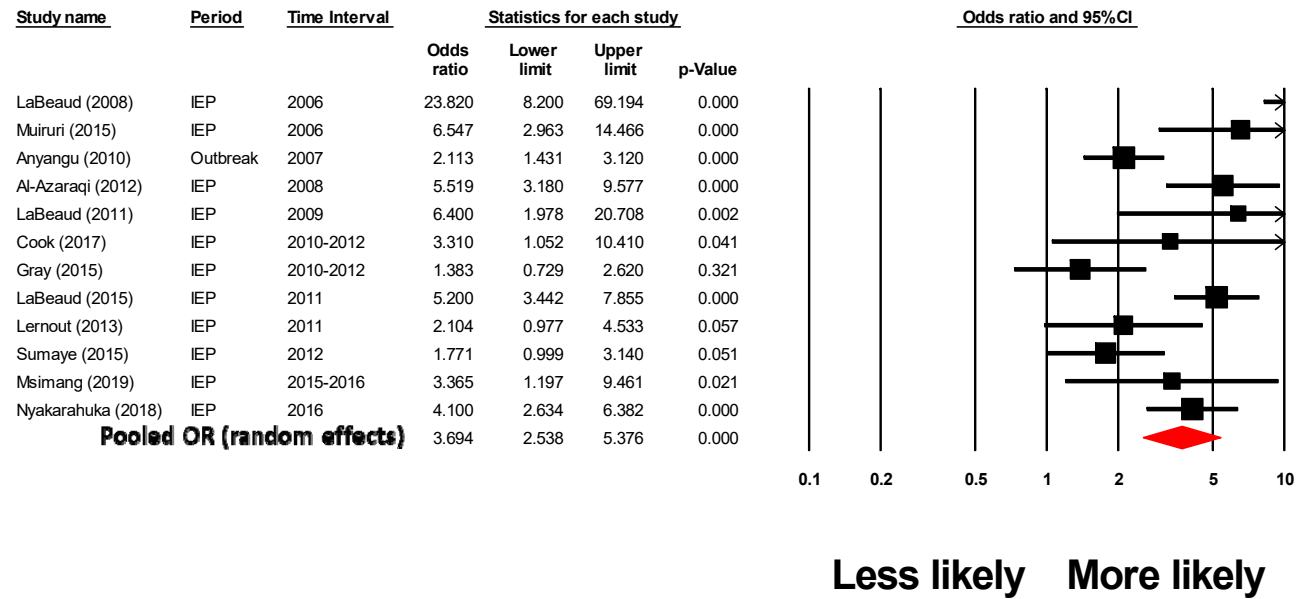

Supplement: pntd.0009852.s002.pdf [file pntd.0009852.s002.pdf]
